# Supplementary material
Source: MDPI journal article supplement (https://www.mdpi.com/2673-9976/11/1/3)
Supplement: s1 [file s1 › blsf-1622207-supplementary.pdf]

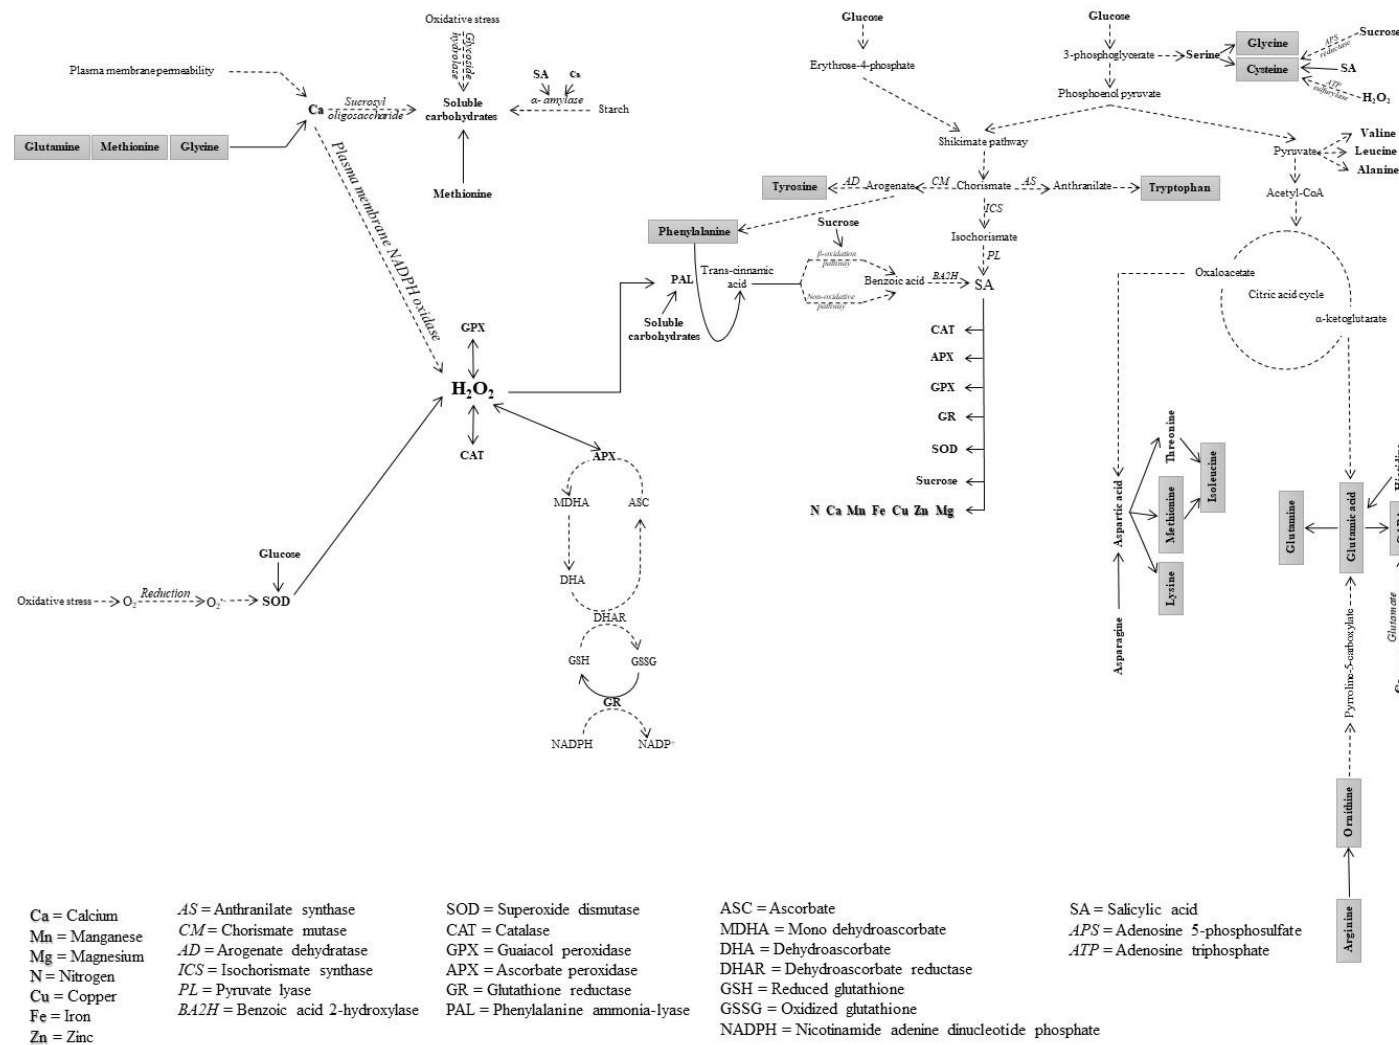

**Figure S1:** The metabolic pathway of physiological changes of cucumber seedlings in response to spirotetramat is demonstrated. The supposable pathways are shown in the dotted arrow, while the line arrow is used for doubtless pathways. The bold font is utilized to represent the assayed metabolites and enzymes.
